# Supplementary material for: Enhancing the energy density of phosphorus doped mesoporous carbon nitride using redox mediated gel-polymer electrolyte
Source: Royal Society of Chemistry journal article supplement (doi:10.1039/d5ra07907a), 2025-01-01
Supplement: d5ra07907a1.pdf [file d5ra07907a1.pdf]

## Enhancing the Energy Density of Phosphorus Doped Mesoporous Carbon Nitride using Redox Mediated Gel-polymer Electrolyte

Mustapha Balarabe Idris<sup>a\*</sup>, Bhekie B. Mamba<sup>a</sup> and Fuku Xolile<sup>a</sup>,

<sup>a</sup>Institute for Nanotechnology and Water Sustainability, College of Science, Engineering and Technology, University of South Africa, Florida Science Campus, 1710, South Africa.

### Supplementary information

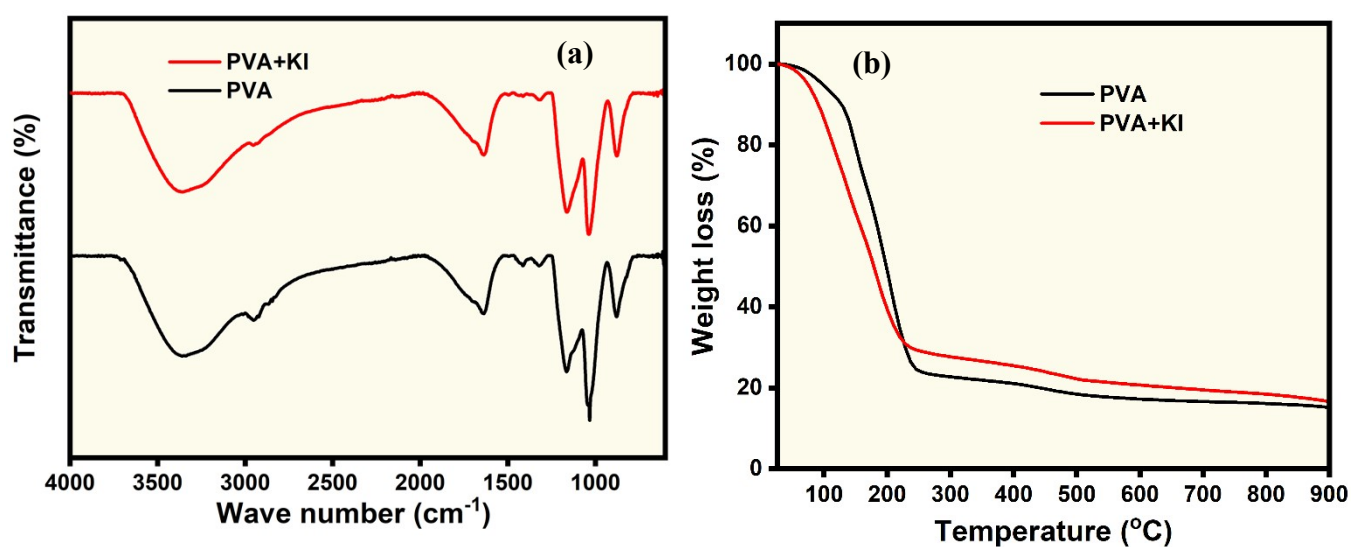

\* Corresponding Author: Dr. Mustapha Balarabe Idris ([idrisbm@unisa.ac.za](mailto:idrisbm@unisa.ac.za))

**Fig. S1** (a) FTIR and (b) thermograms of PVA and PVA+KI.

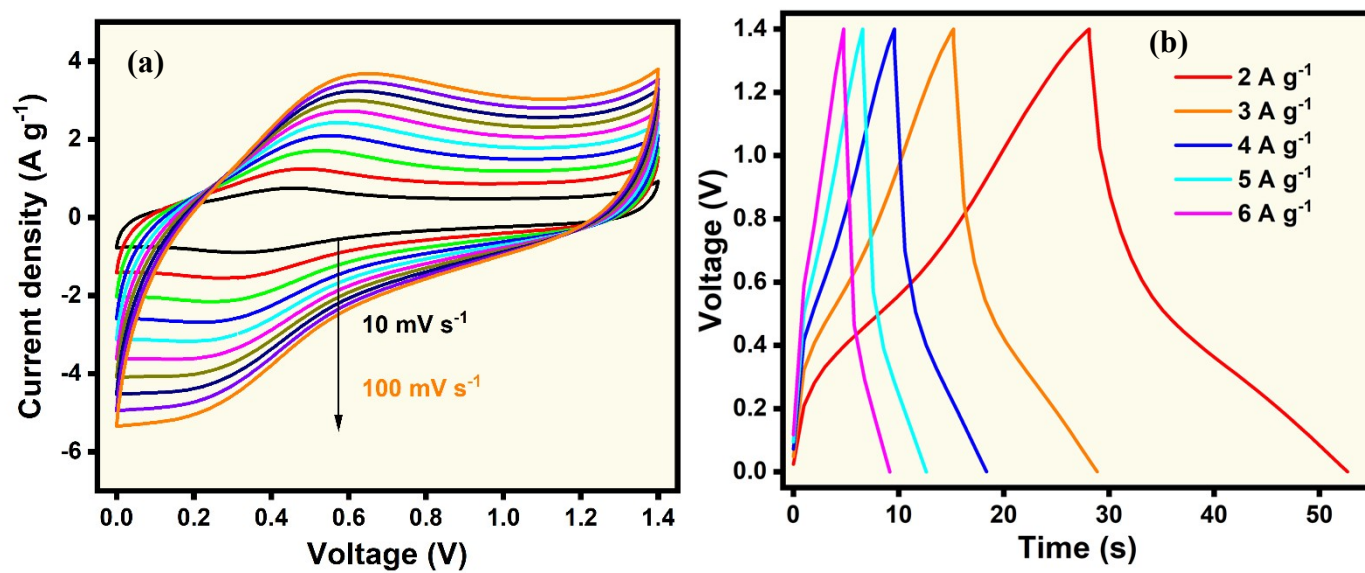

**Fig. S2.** (a) CVs of Mg-CN-based symmetrical device recorded at various scan rates in the range of 10 to 100  $\text{mV s}^{-1}$  and (b) GCD curves recorded at various current densities in the range of 2 to 6  $\text{A g}^{-1}$ .

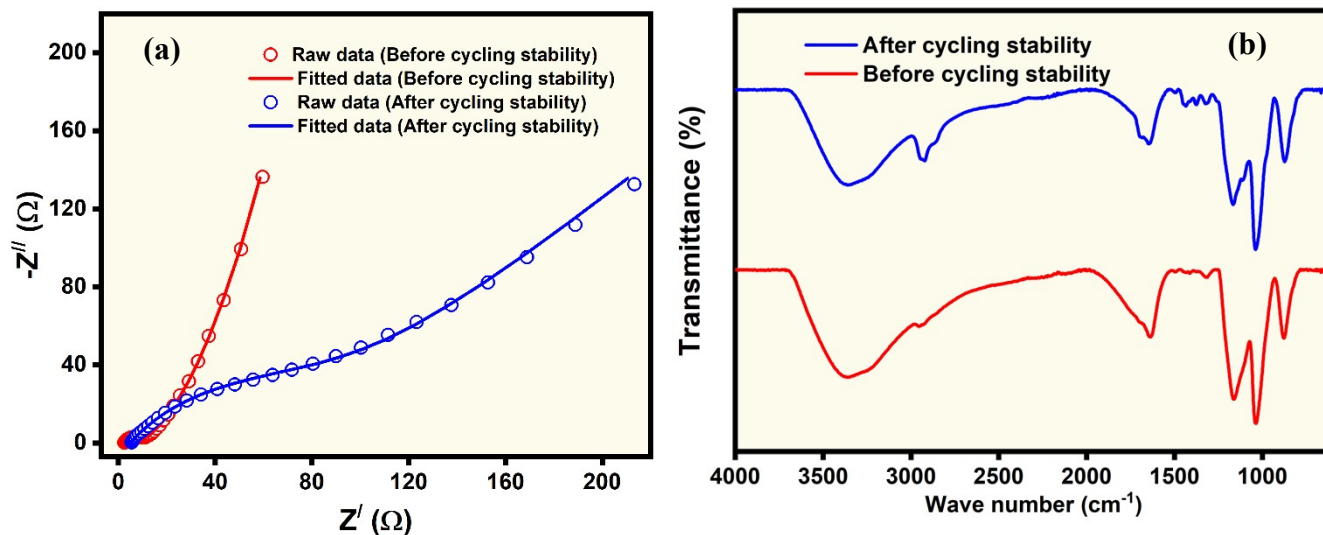

**Fig. S3.** (a) Nyquist plot of symmetrical device and (b) FTIR spectra of R-mgpe recorded before and after cycling stability.

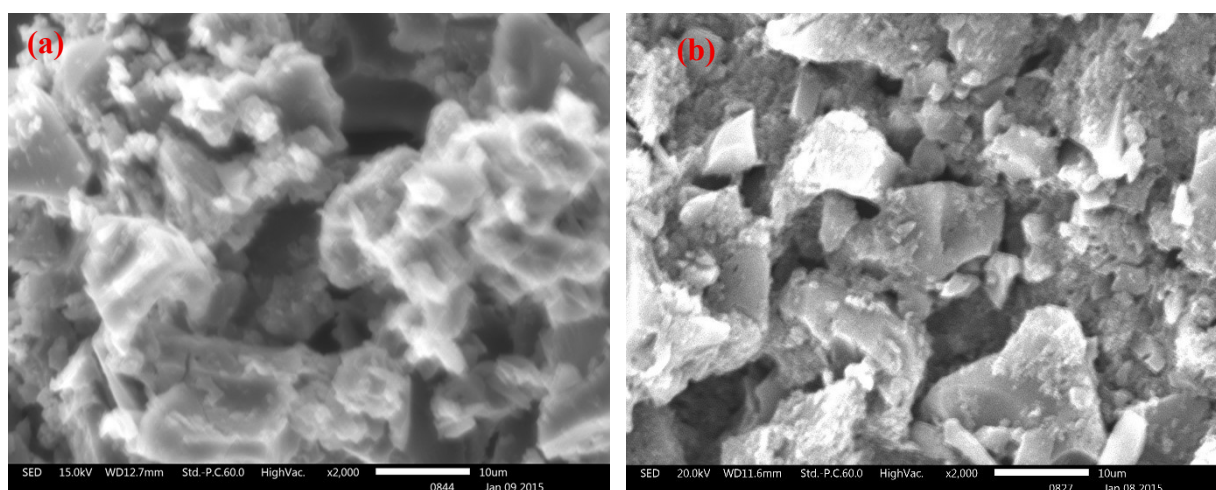

**Fig. S4.** SEM images of P-Mg-CN recorded before (a) and after (b) cycling stability at a current density of 7  $\text{A g}^{-1}$ .
